# Supplementary material for: Fabrication of pH-responsive PLGA(UCNPs/DOX) nanocapsules with upconversion luminescence for drug delivery
Source: PubMed Central journal article supplement (PMC5740179; doi:10.1038/s41598-017-16948-4), 2017-12-21
Supplement: 41598_2017_16948_MOESM1_ESM.pdf [file 41598_2017_16948_MOESM1_ESM.pdf]

## Supplementary information

# **Construction of pH-responsive PLGA(UCNPs/DOX) nanocapsules with upconversion luminescence for drug delivery**

Junwei Zhao<sup>1,2</sup>, Hui Yang<sup>2</sup>, Jili Li<sup>1</sup>, Yujiang Wang<sup>1</sup> & Xin Wang<sup>2,\*</sup>

<sup>1</sup>Materials Science and Engineering School, Luoyang Institute of Science and Technology, Luoyang, 471023, P. R. China.

<sup>2</sup>Suzhou Key Laboratory of Nanobiomedicine, Division of Nanobiomedicine, Suzhou Institute of Nano-Tech & Nano-Bionics, Chinese Academy of Sciences, Suzhou, 215123, P. R. China.

Correspondence and requests for materials should be addressed to X.W. (email: xwang2008@sinano.ac.cn)

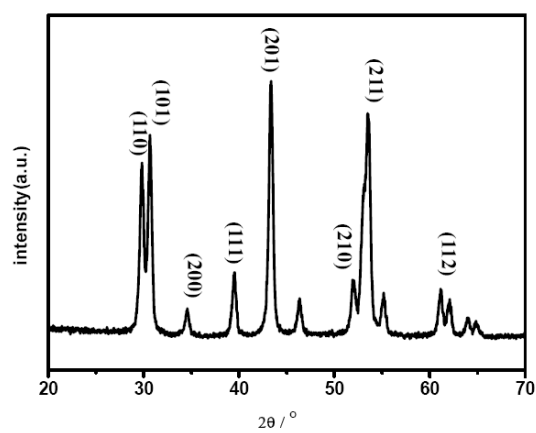

**Figure S1.** The XRD patterns of NaYF<sub>4</sub>:Yb,Er NPs.

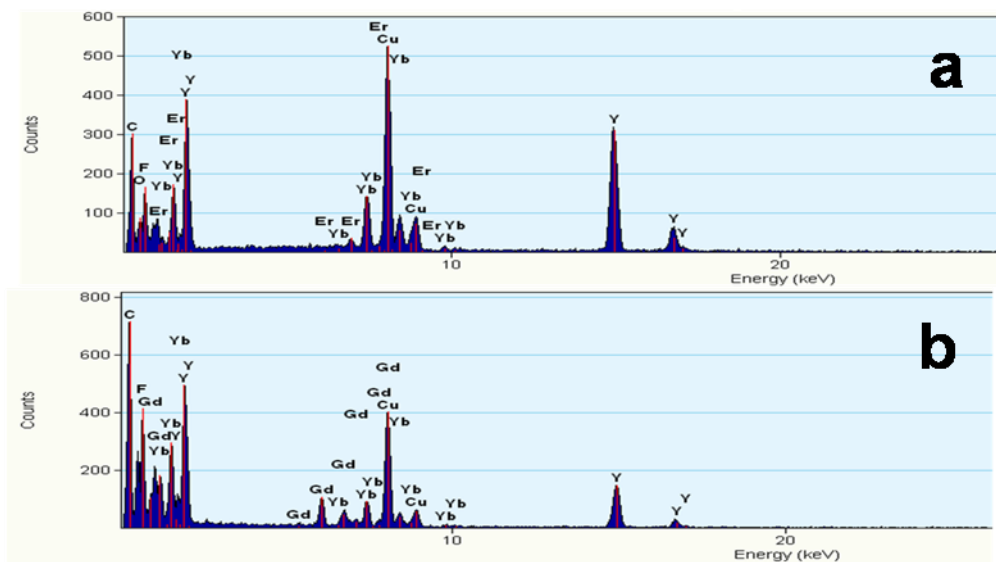

**Figure S2.** The energy dispersive X-ray spectra of NaYF<sub>4</sub>:Yb,Er NPs (a) and NaYF<sub>4</sub>:Yb,Er@NaGdF<sub>4</sub> NPs (b).

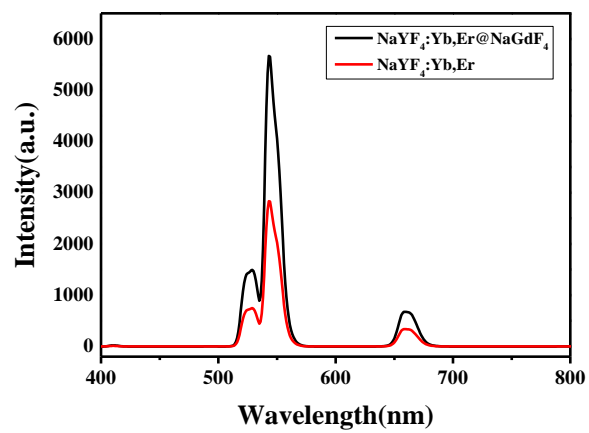

**Figure S3.** The upconversion luminescence spectra of NaYF<sub>4</sub>:Yb,Er nanocrystals and NaYF<sub>4</sub>:Yb,Er@ NaGdF<sub>4</sub> UCNPs under 980 nm excitation.

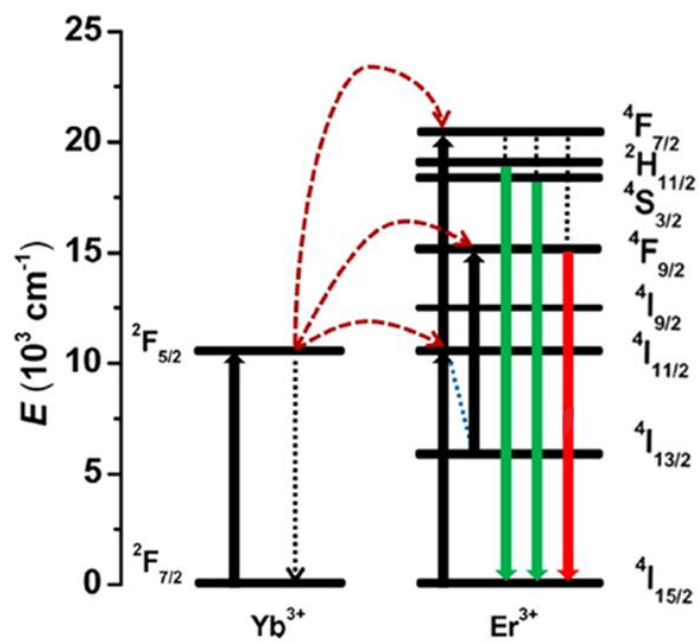

**Figure S4.** Schematic energy levels of  $\text{Yb}^{3+}$  and  $\text{Er}^{3+}$  and the UC luminescence process excited by 980 nm light.

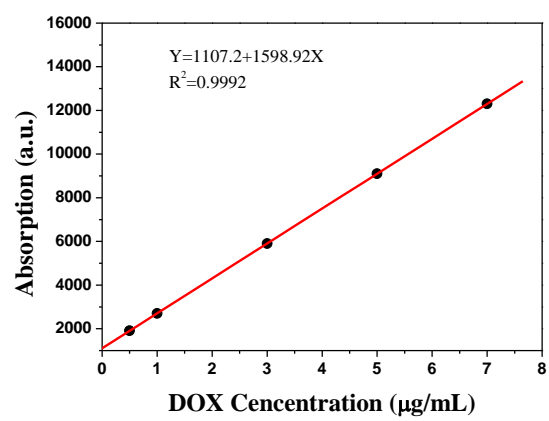

Figure S5. Standard curve of DOX.

**Table S1.** Drug loading efficiency of the drug-carriers with quantity change of DOX.

| Added DOX | Loading efficiency (%)<br>( i ) | Loading efficiency (%)<br>( ii ) | Loading efficiency (%)<br>(iii) | Average loading efficiency (%) |
|-----------|---------------------------------|----------------------------------|---------------------------------|--------------------------------|
| 300 µg    | 1.21%                           | 1.21%                            | 1.21%                           | 1.21%                          |
| 500 µg    | 3.56%                           | 3.55%                            | 3.57%                           | 3.56%                          |
| 1000 µg   | 7.37%                           | 7.23%                            | 7.54%                           | 7.38%                          |

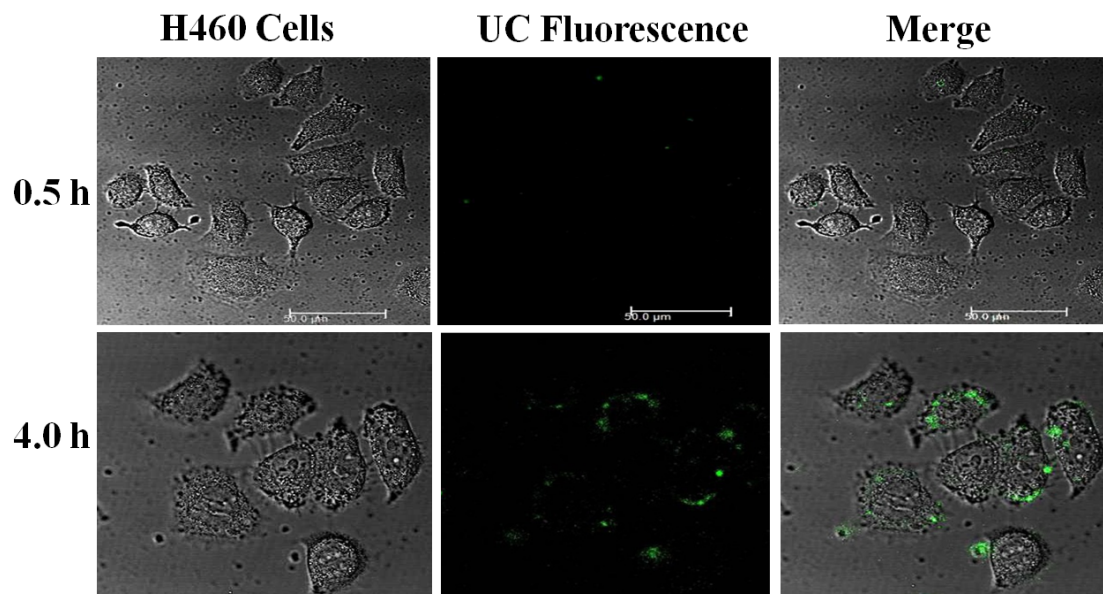

Figure S6. Confocal upconversion fluorescence microscope images of H460 cancer cells under excitation of 980 nm laser after incubation with PLGA(UCNPs/DOX) nanocapsules for 0.5 and 4.0 h, respectively.
